# Supplementary material for: Computationally Designed RNA Aptamers Enable Selective Detection of FUS Pathology in ALS
Source: Research Square preprint supplement (doi:10.21203/rs.3.rs-8435730/v1), 2026-02-11
Supplement: Supplementary file 1 [file 7815b1fa6c29f5f6f5060dd8.docx]

|  | **NAME** | **SEQUENCE (5' -> 3')** | **SECONDARY STRUCTRURE** | **NORMALIZED SCORE** | **Kd (µM)** |
| --- | --- | --- | --- | --- | --- |
|  | **BEST BINDERS** | | | | |
|  | **FUSAPT-1** | GCCCACGGGGAGGGAGAGGCCCACGGGGCAGGGGCGUGGUG | ((((.(((((.........))).))))))............ | 0.84 | 0.023±0.002 |
|  | **FUSAPT-2** | UCGCGUGGGGCGGGUGGGGGAGUGGUGCC | ((((.....))))................ | 0.95 | 0.140±0.018 |
|  | **FUSAPT-3** | AUGUGGGGUUGGGGGGCUGCG | ....(.((((....)))).). | 0.75 | 0.200±0.070 |
|  | **FUSAPT-4** | CCGCGCGUGGCGGGGUGGGGUGGUGGUCC | ((((.....))))................ | 0.69 | 0.530±0.095 |
|  | **FUSAPT-5** | CCGCGUGGGGCGGGGUGGGGGGGUGGUCC | ((((.....))))................ | 0.72 | 0.610±0.180 |
|  | **FUSAPT-6** | CCGCCGUGGGCGGGUGGGGGGGUGGUGCC | (((((...)))))................ | 0.51 | 0.740±0.013 |
|  | **INTERMEDIATE BINDERS** | | | | |
|  | **Interm1** | UUCGCCGGGGGCCCCGGCCCGUGGGGGGGCCGGAUGGGGGCG | ..((((.......(((((((......))))))).....)))) | 0.5 | 1.100±0.160 |
|  | **Interm2** | GCAUAAUUUGUGGUAGUGGGGGACUGCGUUCGCGC | ........(((((..((((....))))..))))). | 0.5 | 1.900±0.400 |
|  | **NEGATIVE CONTROL** | | | | |
|  | **NEGAPT** | UCUUCUUCCUCUUCCUCUUCUUCUUCUUCUUCUCAUUAUUAU | …………………………………… | 0 | N.D. |
