# Supplementary material for: Computationally Designed RNA Aptamers Enable Selective Detection of FUS Pathology in ALS
Source: Research Square preprint supplement (doi:10.21203/rs.3.rs-8435730/v1), 2026-02-11
Supplement: Supplementary file 2 [file f4b9b9879f09aabb5f9f26fd.docx]

| FUSAPT-1 | | |  | FUSAPT-2 | | |
| --- | --- | --- | --- | --- | --- | --- |
| Comparison | p-value (adjusted) | ns/*/**/*** |  | Comparison | p-value (adjusted) | ns/*/**/*** |
| 0 vs 2.5 hours | 0.926578481 | ns |  | 0 vs 2.5 hours | 0.770868516 | ns |
| 0 vs 5 hours | 0.035217328 | * |  | 0 vs 5 hours | 0.655427219 | ns |
| 0 vs 10 hours | 0.002707605 | ** |  | 0 vs 10 hours | 0.008884675 | ** |
| 0 vs 24 hours | 1.18E-07 | *** |  | 0 vs 24 hours | 3.38E-07 | *** |
| 2.5 vs 5 hours | 0.031707701 | * |  | 2.5 vs 5 hours | 0.808052868 | ns |
| 2.5 vs 10 hours | 0.002447667 | ** |  | 2.5 vs 10 hours | 0.019473931 | * |
| 2.5 vs 24 hours | 1.38E-07 | *** |  | 2.5 vs 24 hours | 1.47E-06 | *** |
| 5 vs 10 hours | 0.347500993 | ns |  | 5 vs 10 hours | 0.032415703 | * |
| 5 vs 24 hours | 0.002341471 | ** |  | 5 vs 24 hours | 3.47E-06 | *** |
| 10 vs 24 hours | 0.028920403 | * |  | 10 vs 24 hours | 0.018358321 | * |
|  |  |  |  |  |  |  |
| Size of Aggregates (Figure 4)   | ProteoStat | | |  |  |  |  | | --- | --- | --- | --- | --- | --- | --- | | Comparison | p-value (adjusted) | ns/*/**/*** |  |  |  |  | | 0 vs 2.5 hours | 8.38919E-06 | *** |  |  |  |  | | 0 vs 5 hours | 0.024018094 | * |  |  |  |  | | 0 vs 10 hours | 0.000239845 | *** |  |  |  |  | | 0 vs 24 hours | 0.16854773 | ns |  |  |  |  | | 2.5 vs 5 hours | 0.019662209 | * |  |  |  |  | | 2.5 vs 10 hours | 2.6199E-17 | *** |  |  |  |  | | 2.5 vs 24 hours | 2.00892E-09 | *** |  |  |  |  | | 5 vs 10 hours | 1.3802E-09 | *** |  |  |  |  | | 5 vs 24 hours | 0.000267104 | *** |  |  |  |  | | 10 vs 24 hours | 0.015969383 | * |  |  |  |  |   Size of Aggregates (Supp. Fig. 3)   | FUSAPT-1 | | |  | FUSAPT-2 | | | | --- | --- | --- | --- | --- | --- | --- | | Comparison | p-value (adjusted) | ns/*/**/*** |  | Comparison | p-value (adjusted) | ns/*/**/*** | | 0 vs 2.5 hours | 0.696732179 | ns |  | 0 vs 2.5 hours | 0.138102309 | ns | | 0 vs 5 hours | 0.737562381 | ns |  | 0 vs 5 hours | 0.972910556 | ns | | 0 vs 10 hours | 0.001422334 | ** |  | 0 vs 10 hours | 0.00467536 | ** | | 0 vs 24 hours | 0.001285232 | ** |  | 0 vs 24 hours | 0.002232301 | ** | | 2.5 vs 5 hours | 0.51459083 | ns |  | 2.5 vs 5 hours | 0.147291107 | ns | | 2.5 vs 10 hours | 0.00043649 | *** |  | 2.5 vs 10 hours | 0.182040978 | ns | | 2.5 vs 24 hours | 0.005011465 | ** |  | 2.5 vs 24 hours | 3.34819E-06 | *** | | 5 vs 10 hours | 0.003047581 | ** |  | 5 vs 10 hours | 0.005017705 | ** | | 5 vs 24 hours | 0.000581498 | *** |  | 5 vs 24 hours | 0.001890634 | ** | | 10 vs 24 hours | 7.33678E-11 | *** |  | 10 vs 24 hours | 2.32714E-09 | *** | |  |  |  |  |  |  |  |   Lengths of aggregates (Supp. Fig. 4) | | | | | | |
